# Supplementary material
Source: publisher figshare collection journal article supplement (https://karger.figshare.com/ndownloader/files/32886740)
Supplement: Supplementary file 1 [file 32886740]

Supplemental Fig. 1. Revised ISS calculated from the hypothetical positive signals of FISH analysis if investigated with full plasma cells. Hypothetical positive signals (%) = abnormalities in FISH analysis (%) × mononuclear cells (%)/plasma cells (%). The patient’s prognosis could be successfully stratified by the revised ISS (*p* = 0.03) with a cutoff line of 20%. ISS: International Staging System.
